# Supplementary material for: Polypyrazolylmethane complexes of ruthenium
Source: Royal Society of Chemistry journal article supplement (doi:10.1039/b103939n), 2001-01-01
Supplement: b103939n.doc [file b103939n.doc]

# Electronic Supplementary Information

**Polypyrazolylmethane Complexes of Ruthenium**

Leslie D. Field,* Barbara A. Messerle,* Linnea Soler

Irmi E. Buys and Trevor W. Hambley

*School of Chemistry, University of Sydney, NSW, Australia.*

**Table 1**: Selected Bond Lengths (Å) in [RuCl(PPh3)2(TPM)]Cl.PPh3.2CH3CH2OH **(3a)** (atom numbering is given in Figure 1 in the main text).

**Table 2**: Selected Bond Angles (°) in [RuCl(PPh3)2(TPM)]Cl.PPh3.2CH3CH2OH **(3a)** (atom numbering is given in Figure 1 in the main text).

**Table 3**: Selected Bond Lengths (Å) of [(PPh3)(BPM)Ru-(**-Cl)3-Ru(PPh3)(BPM)]+Cl‑ **(6)**. (The atom numbering scheme is given in Figure 4 in the main text).

**Table 4**: Selected Bond Angles of [(PPh3)(BPM)Ru-(**-Cl)3-Ru(PPh3)(BPM)]+Cl‑ **(6)**. (The atom numbering scheme is given in Figure 4 in the main text).

Compilation of Complete NMR data for [RuCl(PPh3)2(TPM)]+X (3) (3a = Cl‑)(3b = BF4‑), [Ru(CO)(H)(TPM)(PPh3)] +X (4a, X = Cl‑) (4b, X = BF4‑) and [RuCl(PPh3)(BPM)2]+Cl‑ (5)

**Table 1: Selected Bond Lengths (Å) in [RuCl(PPh3)2(TPM)]Cl.PPh3.2CH3CH2OH (3a). (The atom numbering scheme is given in Figure 1 in the main text).**

| Atoms | Distance | Atoms | Distance |
| --- | --- | --- | --- |
| Ru - Cl(1) | 2.399(2) | Ru - P(1) | 2.353(2) |
| Ru - P(2) | 2.373(2) | Ru - N(1) | 2.123(5) |
| Ru - N(3) | 2.071(5) | Ru - N(5) | 2.132(5) |

**Table 2**: Selected Bond Angles (°) in [RuCl(PPh3)2(TPM)]Cl.PPh3.2CH3CH2OH **(3a).** (The atom numbering scheme is given in Figure 1 of the main text).

| Atoms | Angle | Atoms | Angle |
| --- | --- | --- | --- |
|  |  |  |  |
| Cl(1) - Ru - N(3) | 173.1(2) | Cl(1) - Ru - N(5) | 88.5(2) |
| P(1) - Ru - P(2) | 103.96(6) | P(1) - Ru - N(1) | 89.2(1) |
| P(1) - Ru - N(3) | 93.7(2) | P(1) - Ru - N(5) | 167.5(1) |
| P(2) - Ru - N(1) | 166.7(1) | P(2) - Ru - N(3) | 90.0(1) |
| P(2) - Ru - N(5) | 88.5(1) | N(1) - Ru - N(3) | 87.3(2) |
| N(1) -Ru - N(5) | 78.4(2) | N(3) - Ru - N(5) | 86.6(2) |

**Table 3**: Selected Bond Lengths (Å) of [(PPh3)(BPM)Ru-(**-Cl)3-Ru(PPh3)(BPM)]+Cl‑ **(6)**. (The atom numbering scheme is given in Figure 4 in the main text).

| Atoms (Ru(1) centre) | Bond Length | Atoms (Ru(2) centre) | Bond Length |
| --- | --- | --- | --- |
| Ru(1) - Cl(1) | 2.422 (2) | Ru(2) - Cl(1) | 2.541 (2) |
| Ru(1) - Cl(2) | 2.556 (2) | Ru(2) - Cl(2) | 2.398 (2) |
| Ru(1) - Cl(3) | 2.396 (2) | Ru(2) - Cl(3) | 2.415 (2) |
| Ru(1) - P(1) | 2.275 (2) | Ru(2) - P(2) | 2.251 (2) |
| Ru(1) - N(1) | 2.017 (6) | Ru(2) - N(5) | 2.020 (6) |
| Ru(1) - N(4) | 2.026 (6) | Ru(2) - N(7) | 2.045 (6) |

**Table 4**: Selected Bond Angles of [(PPh3)(BPM)Ru-(**-Cl)3-Ru(PPh3)(BPM)]+Cl‑ **(6)**. (The atom numbering scheme is given in Figure 4 of the main text).

| Atoms(Ru(1) centre) | Bond Angle | Atoms (Ru(2) centre) | Bond Angle |
| --- | --- | --- | --- |
| Ru(1)-Cl(1)-Ru(2) | 80.49 (6) | N(1)-Ru(1)-N(4) | 88.4 (3) |
| Ru(1)-Cl(2)-Ru(2) | 80.61 (6) | Cl(1)-Ru(2)-Cl(2) | 80.85 (6) |
| Ru(1)-Cl(3)-Ru(2) | 83.63 (6) | Cl(1)-Ru(2)-Cl(3) | 80.62 (7) |
| Cl(1)-Ru(1)-Cl(2) | 80.10 (6) | Cl(2)-Ru(2)-Cl(3) | 84.72 (7) |
| Cl(1)-Ru(1)-Cl(3) | 83.46 (7) | Cl(1)-Ru(2)-P(2) | 171.01 (8) |
| Cl(2)-Ru(1)-Cl(3) | 81.74 (6) | Cl(1)-Ru(2)-N(5) | 90.1 (2) |
| Cl(1)-Ru(1)-P(1) | 98.94 (7) | Cl(1)-Ru(2)-N(7) | 87.8 (2) |
| Cl(1)-Ru(1)-N(1) | 92.1 (2) | Cl(2)-Ru(2)-P(2) | 93.81(7) |
| Cl(1)-Ru(1)-N(4) | 168.5 (2) | Cl(2)-Ru(2)-N(5) | 170.9 (2) |
| Cl(2)-Ru(1)-P(1) | 174.00 (7) | Cl(2)-Ru(2)-N(7) | 92.4 (2) |
| Cl(2)-Ru(1)-N(1) | 86.5 (2) | Cl(3)-Ru(2)-P(2) | 91.75 (7) |
| Cl(2)-Ru(1)-N(4) | 88.4 (2) | Cl(3)-Ru(2)-N(5) | 93.4 (2) |
| Cl(3)-Ru(1)-P(1) | 92.27 (7) | Cl(3)-Ru(2)-N(7) | 168.4 (2) |
| Cl(3)-Ru(1)-N(1) | 167.9 (2) | P(2)-Ru(2)-N(5) | 95.1 (2) |
| Cl(3)-Ru(1)-N(4) | 93.8 (2) | P(2)-Ru(2)-N(7) | 99.7 (2) |
| P(1)-Ru(1)-N(1) | 99.5 (2) | N(5)-Ru(2)-N(7) | 87.7 (3) |
| P(1)-Ru(1)-N(4) | 92.3 (2) |  |  |
|  |  |  |  |

**Compilation of Complete NMR data for [RuCl(PPh3)2(TPM)]+X (3) (3a = Cl**‑**)(3b = BF4**‑**), [Ru(CO)(H)(TPM)(PPh3)] +X (4a, X = Cl‑) (4b, X = BF4‑) and [RuCl(PPh3)(BPM)2]+Cl‑ (5)**

***(i) Chlorobis(triphenylphosphine)tris(1-pyrazolyl)-methaneruthenium(II) chloride (3a) and tetrafluoroborate (3b) [RuCl(PPh3)2(TPM)]+X (3) (3a = Cl****‑****)(3b = BF4****‑****)***

**(3a)** ***[RuCl(PPh3)2(TPM)]+Cl****‑*

H (400 MHz; solvent MeOD): 9.82 [1H, s, Hapical], 8.61 [1H, d, HB5], 8.49 [2H, d, *3J*HA5-HA4  = 2.8 Hz, HA5], 7.55 [6H, m, HPhpara], 7.38 [12H, s(b), HPhortho], 7.35 [12H, m, HPhmeta], 7.12 [2H, d, 3*J* HA3-HA4 2.1 Hz, HA3], 6.28 [2H, dd, 3*J* HA4-HA3 = 3*J* HA4-HA5 = 2.5 Hz, HA4], 5.93 [1H, dd, 3*J* HB4-HB3 = 3*J* HB4-HB5 = 2.7 Hz, HB4], 5.46 [1H, d, 3*J* HB3-HB4 = 2.3 Hz, HB3]. P{1H}(162 MHz; solvent MeOD): 39.3. 13C{1H} (150 MHz; solvent MeOD): 152.1 [CB3], 149.6 [CA3], 136.6 [CB5], 135.9 [dd, 3*J* CP 4.4, 4.9 Hz, CPhortho], 134.9 [d, 3*J* CP 40.3 Hz, CPhipso], 134.8 [CA5], 131.5 [s, CPhpara], 129.5 [dd, 3*J* CP 4.4, 4.9 Hz, CPhmeta], 109.6 [CA4], 109.3 [CB4], 77.6 [Capical].

**(3b)** ***[RuCl(PPh3)2(TPM)]+BF4****‑*

H (600 MHz; solvent acetone-*d6*): 9.67 [1H, s, Hapical], 8.64 [1H, d, 3*J* HB5-HB4 = 2.7 Hz, HB5], 8.52 [2H, d, *3J* HA5-HA4 = 2.4 Hz, HA5], 7.52 [6H, m, HPhpara], 7.41 [12H, s(br), HPhortho], 7.34 [12H, m, HPhmeta], 7.11 [2H, d, 3*J* HA3-HA4 = 1.8 Hz, HA3], 6.26 [2H, dd,3*J* HA4-HA3 = 3*J*HA4‑HA5 = 2.2 Hz, HA4], 5.94 [1H, dd, 3*J* HB4-HB3,5 = 2.3, 2.4 Hz, HB4], 5.43 [1H, d, 3*J* HB3-HB4 = 2.2 Hz, HB3]. P{1H}(162 MHz; solvent MeOD): 39.3. 13C{1H} (150 MHz; solvent acetone‑*d6*): 151.0 [CB3], 148.8 [CA3], 136.5 [CB5], 135.6 [CA5], 135.3 [CPhortho], 130.8 [CPhpara], 128.9 [CPhmeta], 109.0 [CA4], 108.6 [CB4], 77.0 [Capical].

***(ii) Carbonylhydridotris(1-pyrazolyl)methanetriphenylphosphineruthenium(II) chloride (4a) and tetrafluoroborate (4b) [Ru(CO)(H)(TPM)(PPh3)] +X (4a, X = Cl‑) (4b, X = BF4‑)***

**(4a) *[Ru(CO)(H)(TPM)(PPh3)]+Cl****‑*

H (400 MHz; solvent MeOD): 9.82 [1H, s, Hapical], 8.58 [1H, d, 3*J* HC5-HC4 = 2.7 Hz, HC5], 8.49 [1H, d, 3*J* HA5-HA4 = 3.0 Hz, HA5], 8.45 [1H, d, 3*J* HB5-HB4 = 3.0 Hz, HB5], 8.24 [1H, d, 3*J* HA3-HA4 = 2.0 Hz, HA3], 7.69 [3H, m, HPhpara], 7.59 [6H, m, HPhortho], 7.55 [6H, m, HPhmeta], 7.07 [1H, d, 3*J* HC3-HC4 = 1.8 Hz, HC3], 6.78 [1H, d, 3*J* HB3-HB4 = 2.1 Hz, HB3], 6.71 [1H, dd, 3*J* HA4-HA3,5 = 1.8, 3.1 Hz, HA4], 6.57 [1H, dd, 3*J* HC4-HC3,5 = 2.6, 2.3 Hz, HC4], 6.30 [1H, dd, 3*J* HB4-HB3,5 = 2.9, 2.1 Hz, HB4], -12.12 [1H, d, 3*J* Hydride-P = 27.3 Hz, Hhydride]. P{1H}(162 MHz; solvent MeOD): 63.5.C{1H}(100 MHz; solvent MeOD): 206.3 [d, 3*J*C-Ru-P 18.1 Hz, Ru-CO], 149.1 [CB3], 149.0 [CA3], 147.4 [CC3], 134.8 [d, 3*J*CP 10.7 Hz, CPhmeta], 135.2 [CC5], 135.0 [CB5], 134.5 [CA5], 132.2 [d, 3*J*CP 2.2 Hz, CPhpara], 130.0 [d, 3*J*CP 9.9 Hz, CPhortho], 109.7 [CA4], 109.5 [CC4], 109.3 [CB4], 69.1 [Capical].

**(4b) *[Ru(CO)(H)(TPM)(PPh3)]+BF4‑***

H (600 MHz; solvent *d6*-acetone): 9.81 [1H, s, Hapical], 8.68 [1H, d, 3*J* HC5-HC4 = 2.5 Hz, HC5], 8.62 [1H, d, 3*J* HA5-HA4 = 2.4 Hz, HA5], 8.57 [1H, d, 3*J* HB5-HB4 = 2.7 Hz, HB5], 8.34 [1H, d, 3*J* HA3-HA4 = 2.1 Hz, HA3], 7.70 [3H, m, HPhmeta], 7.61[6H, m, HPhortho], 7.55 [6H, m, Hphmeta], 7.18 [1H, d, 3*J* HC3-HC4 = 2.1 Hz, HC3], 6.86 [1H, d, 3*J* HB3-HB4 = 2.3 Hz, HB3], 6.77 [1H, dd, 3*J* HA4-HA3 = 3*J* HA4-HA5 = 2.4 Hz, HA4], 6.63 [1H, dd, 3*J* HC4-HC3 = 3*J* HC4-HC5 = 2.3 Hz, HC4], 6.37 [1H, dd, 3*J* HB4-HB3,5 = 2.9, 2.6 Hz, HB4], -12.10 [1H, d, 3*J* hydride‑P 26.9 Hz, Hhydride]. P{1H}(16MHz; solvent *d6*-acetone):64.9. 13C{1H} (150 MHz; solvent *d6*-acetone): 148.4 [CA3], 148.3 [CB3], 146.8 [CC3], 135.2 [CC5], 135.0 [CB5], 134.7 [CPhmeta], 134.7 [CA5], 131.7 [CPhpara], 129.6 [CPhortho], 109.4 [CA4], 109.1 [CC4], 108.8 [CB4], 77.2 [Capical].

***(iii) Chlorotriphenylphosphinebis[bis(1-pyrazolyl)methane]ruthenium(II) chloride [RuCl(PPh3)(BPM)2]+Cl‑ (5)***

H (400 MHz; solvent MeOD): 8.46 [1H, d, 3*J*RQ = 2.8 Hz, HR], 8.43 [1H, dd, *3J* CB = 2.8 Hz, 6*J*CF = 0.8 Hz, HC], 8.25 [1H, dd, *3J*FG = 2.8 Hz, 6*J*FC 0.8 Hz, HF], 8.23 [1H, d, 3*J*ED = 13.6 Hz, HE], 8.21 [1H, dd, *3J*PQ = 2.8 Hz, HP], 8.17 [1H, dd, *3J*ML = 2.8 Hz, *6J*MP = 0.8 Hz, HM], 7.55-7.21 [15H, m, aromatics], 7.54 [1H, d, *3J*AB = 2.8 Hz, HA], 6.99 [1H, d, *3J*DE = 13.6 Hz, HD], 6.74 [1H, dd, *3J*QR,QP = 2.6, 2.5 Hz, HQ], 6.69 [1H, d, *3J*ON = 14.4 Hz, HO], 6.52 [1H, dd, *3J*BC, BA = 2.6, 2.5 Hz, HB], 6.47 [1H, dd, *3J*LM, LK = 2.6, 2.5 Hz, HL], 6.41 [1H, dt, *3J*GF, GH = 2.6, 2.5 Hz, HG], 6.04 [1H, d, *3J*KL = 2.2 Hz, HK], 5.86 [1H, d, *3J*HG = 2.2 Hz, HH], 5.72 [1H, d, 3*J*NO = 14.2 Hz, HN]. P{1H}(162 MHz; solvent MeOD):50.8. 13C{1H} (100 MHz; solvent MeOD): 151.6 [Ca], 148.8 [Cr], 147.1 [Ck], 144.2 [Ch], 137.0 [Cc], 136.4 [Cm], 136.0 [Cp], 134.6 [Cf], 134.6-128.8 [PPh3], 110.0 [Cl], 109.4 [Cq], 109.1 [Cb], 108.9 [Cg], 64.3 [Cd,e], 63.4 [Co,n].
